# Supplementary material for: Cembrane Derivatives from the Soft Corals, Sinularia gaweli and Sinularia flexibilis
Source: MDPI journal article supplement (doi:10.3390/md11062154), 2013-06-17
Supplement: s1 [file s1]

marinedrugs-11-02154-s001.mol
  corina  04151400013D 1   1.00000     0.00000 
CORINA 3.49 0023  12.04.2013
 28 31  0  0  0  0  0  0  0  0999 V2000
   -0.0190    1.5495    0.0106 C   0  0  0  0  0  0  0  0  0  0  0  0
    0.0021   -0.0041    0.0020 C   0  0  0  0  0  0  0  0  0  0  0  0
    0.2189   -0.4470    1.4057 C   0  0  0  0  0  0  0  0  0  0  0  0
    1.5396    0.0369    1.9867 C   0  0  0  0  0  0  0  0  0  0  0  0
    1.4752    1.4439    2.5331 C   0  0  0  0  0  0  0  0  0  0  0  0
    1.7799    2.4574    1.4028 C   0  0  0  0  0  0  0  0  0  0  0  0
    1.4266    2.0065   -0.0008 C   0  0  0  0  0  0  0  0  0  0  0  0
   -0.8512    1.9587   -1.1663 C   0  0  0  0  0  0  0  0  0  0  0  0
   -1.5607    0.7831   -1.6609 C   0  0  0  0  0  0  0  0  0  0  0  0
   -1.2448   -0.3801   -0.7188 C   0  0  0  0  0  0  0  0  0  0  0  0
   -2.3642    0.6241   -2.7084 C   0  0  0  0  0  0  0  0  0  0  0  0
   -3.0223   -0.7025   -2.9764 C   0  0  0  0  0  0  0  0  0  0  0  0
   -2.6338   -1.7678   -1.9505 C   0  0  0  0  0  0  0  0  0  0  0  0
   -1.1157   -1.6169   -1.6410 C   0  0  0  0  0  0  0  0  0  0  0  0
   -2.6188    1.7841   -3.6361 C   0  0  0  0  0  0  0  0  0  0  0  0
   -0.9231    3.0778   -1.6295 O   0  0  0  0  0  0  0  0  0  0  0  0
   -0.5044    1.9010    0.9210 H   0  0  0  0  0  0  0  0  0  0  0  0
    2.2680    3.5393    1.6254 O   0  0  0  0  0  0  0  0  0  0  0  0
   -3.2778   -1.4555   -0.6719 O   0  0  0  0  0  0  0  0  0  0  0  0
   -0.5978   -2.7514   -0.9433 O   0  0  0  0  0  0  0  0  0  0  0  0
    0.8503   -0.3306   -0.5996 H   0  0  0  0  0  0  0  0  0  0  0  0
    1.9487   -0.8947    3.0983 C   0  0  0  0  0  0  0  0  0  0  0  0
    1.0538   -1.0759    4.2972 C   0  0  0  0  0  0  0  0  0  0  0  0
    3.0821   -1.5471    3.0224 C   0  0  0  0  0  0  0  0  0  0  0  0
    2.2993   -0.0002    1.2059 H   0  0  0  0  0  0  0  0  0  0  0  0
   -2.8745   -2.7703   -2.3042 H   0  0  0  0  0  0  0  0  0  0  0  0
   -2.4733   -0.6794    0.0904 C   0  0  0  0  0  0  0  0  0  0  0  0
   -2.7016   -0.2976    1.2137 O   0  0  0  0  0  0  0  0  0  0  0  0
  1  2  1  0      
  2  3  1  0      
  3  4  1  0      
  4  5  1  0      
  5  6  1  0      
  6  7  1  0      
  1  7  1  0      
  1  8  1  0      
  8  9  1  0      
  9 10  1  0      
 10  2  1  0      
  9 11  2  0      
 11 12  1  0      
 12 13  1  0      
 13 14  1  0      
 14 10  1  0      
 11 15  1  0      
  8 16  2  0      
  1 17  1  0      
  6 18  2  0      
 14 20  1  0      
  2 21  1  0      
  4 22  1  0      
 22 23  1  0      
 22 24  2  0      
  4 25  1  0      
 13 26  1  0      
 10 27  1  0      
 27 19  1  0      
 13 19  1  0      
 27 28  2  0      
M  END
$$$$
