# Supplementary material for: Cembrane Derivatives from the Soft Corals, Sinularia gaweli and Sinularia flexibilis
Source: MDPI journal article supplement (doi:10.3390/md11062154), 2013-06-17
Supplement: s2 [file s2]

marinedrugs-11-02154-s001.mol
  ChemDraw02071408442D

 28 31  0  0  0  0  0  0  0  0999 V2000
    0.4468    0.8339    0.0000 C   0  0  0  0  0  0  0  0  0  0  0  0
    0.1921    0.0492    0.0000 C   0  0  0  0  0  0  0  0  0  0  0  0
    0.6473   -0.6396    0.0000 C   0  0  0  0  0  0  0  0  0  0  0  0
    1.4688   -0.7148    0.0000 C   0  0  0  0  0  0  0  0  0  0  0  0
    2.0390   -0.1198    0.0000 C   0  0  0  0  0  0  0  0  0  0  0  0
    1.9275    0.6979    0.0000 C   0  0  0  0  0  0  0  0  0  0  0  0
    1.2194    1.1225    0.0000 C   0  0  0  0  0  0  0  0  0  0  0  0
   -0.2207    1.3187    0.0000 C   0  0  0  0  0  0  0  0  0  0  0  0
   -0.8880    0.8336    0.0000 C   0  0  0  0  0  0  0  0  0  0  0  0
   -0.6329    0.0491    0.0000 C   0  0  0  0  0  0  0  0  0  0  0  0
   -1.6950    1.0050    0.0000 C   0  0  0  0  0  0  0  0  0  0  0  0
   -2.2470    0.3918    0.0000 C   0  0  0  0  0  0  0  0  0  0  0  0
   -1.9919   -0.3928    0.0000 C   0  0  0  0  0  0  0  0  0  0  0  0
   -1.1849   -0.5641    0.0000 C   0  0  0  0  0  0  0  0  0  0  0  0
   -1.9086    1.8019    0.0000 C   0  0  0  0  0  0  0  0  0  0  0  0
   -0.2207    2.1437    0.0000 O   0  0  0  0  0  0  0  0  0  0  0  0
    0.4468    1.6589    0.0000 H   0  0  0  0  0  0  0  0  0  0  0  0
    2.6420    1.1104    0.0000 O   0  0  0  0  0  0  0  0  0  0  0  0
   -1.6548    0.0385    0.0000 O   0  0  0  0  0  0  0  0  0  0  0  0
   -0.7724   -1.2786    0.0000 O   0  0  0  0  0  0  0  0  0  0  0  0
   -0.0215   -0.7477    0.0000 H   0  0  0  0  0  0  0  0  0  0  0  0
    1.8813   -1.4292    0.0000 C   0  0  0  0  0  0  0  0  0  0  0  0
    1.4688   -2.1437    0.0000 C   0  0  0  0  0  0  0  0  0  0  0  0
    2.7063   -1.4292    0.0000 C   0  0  0  0  0  0  0  0  0  0  0  0
    2.2938   -0.7148    0.0000 H   0  0  0  0  0  0  0  0  0  0  0  0
   -2.7063   -0.8053    0.0000 H   0  0  0  0  0  0  0  0  0  0  0  0
   -1.2217    0.1829    0.0000 C   0  0  0  0  0  0  0  0  0  0  0  0
   -1.2217    0.6573    0.0000 O   0  0  0  0  0  0  0  0  0  0  0  0
  1  2  1  0      
  2  3  1  0      
  3  4  1  0      
  4  5  1  0      
  5  6  1  0      
  6  7  1  0      
  1  7  1  0      
  1  8  1  0      
  8  9  1  0      
  9 10  1  0      
 10  2  1  0      
  9 11  2  0      
 11 12  1  0      
 12 13  1  0      
 13 14  1  0      
 14 10  1  0      
 11 15  1  0      
  8 16  2  0      
  1 17  1  1      
  6 18  2  0      
 14 20  1  1      
  2 21  1  6      
  4 22  1  0      
 22 23  1  0      
 22 24  2  0      
  4 25  1  0      
 13 26  1  6      
 10 27  1  1      
 27 19  1  0      
 13 19  1  1      
 27 28  2  0      
M  END
