# Supplementary material for: Cembrane Derivatives from the Soft Corals, Sinularia gaweli and Sinularia flexibilis
Source: MDPI journal article supplement (doi:10.3390/md11062154), 2013-06-17
Supplement: s3 [file s3]

marinedrugs-11-02154-s002.mol
  corina  04151400013D 1   1.00000     0.00000 
CORINA 3.49 0023  12.04.2013
 27 28  0  0  0  0  0  0  0  0999 V2000
   -0.0076    1.5608    0.2672 C   0  0  0  0  0  0  0  0  0  0  0  0
    0.0032    0.0423    0.4423 C   0  0  0  0  0  0  0  0  0  0  0  0
    0.8914   -0.3529    1.6065 C   0  0  0  0  0  0  0  0  0  0  0  0
    1.9025   -1.4223    1.1413 C   0  0  0  0  0  0  0  0  0  0  0  0
    2.8674   -1.6404    2.3063 C   0  0  0  0  0  0  0  0  0  0  0  0
    4.0728   -2.4684    1.8821 C   0  0  0  0  0  0  0  0  0  0  0  0
    5.0809   -1.6061    1.1327 C   0  0  0  0  0  0  0  0  0  0  0  0
    1.3958    2.0957   -0.0000 C   0  0  0  0  0  0  0  0  0  0  0  0
    1.4975    2.6945   -1.3787 C   0  0  0  0  0  0  0  0  0  0  0  0
    2.3261    2.0241   -2.4434 C   0  0  0  0  0  0  0  0  0  0  0  0
    4.7851   -1.4316   -0.3521 C   0  0  0  0  0  0  0  0  0  0  0  0
    3.7865    1.9039   -2.0038 C   0  0  0  0  0  0  0  0  0  0  0  0
    4.1375    0.4473   -1.8114 C   0  0  0  0  0  0  0  0  0  0  0  0
    4.5591    0.0301   -0.6469 C   0  0  0  0  0  0  0  0  0  0  0  0
    4.0335   -0.5009   -2.9790 C   0  0  0  0  0  0  0  0  0  0  0  0
    0.9196    3.7301   -1.6232 O   0  0  0  0  0  0  0  0  0  0  0  0
    3.6437   -3.6900    1.0744 C   0  0  0  0  0  0  0  0  0  0  0  0
    4.7161   -2.9521    3.0831 O   0  0  0  0  0  0  0  0  0  0  0  0
    2.3532    1.0401    0.1085 O   0  0  0  0  0  0  0  0  0  0  0  0
    1.7235    3.1822    1.0359 C   0  0  0  0  0  0  0  0  0  0  0  0
    0.1476   -0.9559    2.7705 C   0  0  0  0  0  0  0  0  0  0  0  0
    0.8502   -1.9557    3.5927 C   0  0  0  0  0  0  0  0  0  0  0  0
    2.1387   -2.2775    3.3842 O   0  0  0  0  0  0  0  0  0  0  0  0
    1.4441    0.5126    1.9745 H   0  0  0  0  0  0  0  0  0  0  0  0
   -1.0923   -0.5907    3.0797 C   0  0  0  0  0  0  0  0  0  0  0  0
    0.2436   -2.5188    4.4817 O   0  0  0  0  0  0  0  0  0  0  0  0
    3.2093   -0.6607    2.6593 H   0  0  0  0  0  0  0  0  0  0  0  0
  1  2  1  0      
  2  3  1  0      
  3  4  1  0      
  4  5  1  0      
  5  6  1  0      
  6  7  1  0      
  1  8  1  0      
  8  9  1  0      
  9 10  1  0      
  7 11  1  0      
 10 12  1  0      
 12 13  1  0      
 13 14  2  0      
 11 14  1  0      
 13 15  1  0      
  9 16  2  0      
  6 17  1  0      
  6 18  1  0      
  8 19  1  0      
  8 20  1  0      
  3 21  1  0      
 21 22  1  0      
 22 23  1  0      
  5 23  1  0      
  3 24  1  0      
 21 25  2  0      
 22 26  2  0      
  5 27  1  0      
M  END
$$$$
