# Supplementary material for: Cembrane Derivatives from the Soft Corals, Sinularia gaweli and Sinularia flexibilis
Source: MDPI journal article supplement (doi:10.3390/md11062154), 2013-06-17
Supplement: s4 [file s4]

marinedrugs-11-02154-s002.mol
  ChemDraw02071408452D

 27 28  0  0  0  0  0  0  0  0999 V2000
   -0.1229    0.5915    0.0000 C   0  0  0  0  0  0  0  0  0  0  0  0
    0.7021    0.5915    0.0000 C   0  0  0  0  0  0  0  0  0  0  0  0
    0.9908    0.0140    0.0000 C   0  0  0  0  0  0  0  0  0  0  0  0
    0.7021   -0.5752    0.0000 C   0  0  0  0  0  0  0  0  0  0  0  0
   -0.1229   -0.5752    0.0000 C   0  0  0  0  0  0  0  0  0  0  0  0
   -0.8654   -1.0173    0.0000 C   0  0  0  0  0  0  0  0  0  0  0  0
   -1.5519   -0.5752    0.0000 C   0  0  0  0  0  0  0  0  0  0  0  0
   -0.8654    1.1484    0.0000 C   0  0  0  0  0  0  0  0  0  0  0  0
   -1.5519    0.5915    0.0000 C   0  0  0  0  0  0  0  0  0  0  0  0
   -2.5567    1.0040    0.0000 C   0  0  0  0  0  0  0  0  0  0  0  0
   -2.6598   -0.8935    0.0000 C   0  0  0  0  0  0  0  0  0  0  0  0
   -3.1548    0.4059    0.0000 C   0  0  0  0  0  0  0  0  0  0  0  0
   -2.6392    0.0346    0.0000 C   0  0  0  0  0  0  0  0  0  0  0  0
   -3.1961   -0.3366    0.0000 C   0  0  0  0  0  0  0  0  0  0  0  0
   -1.8142    0.0346    0.0000 C   0  0  0  0  0  0  0  0  0  0  0  0
   -1.3384   -0.2054    0.0000 O   0  0  0  0  0  0  0  0  0  0  0  0
   -1.2779   -1.7317    0.0000 C   0  0  0  0  0  0  0  0  0  0  0  0
   -0.4529   -1.7317    0.0000 O   0  0  0  0  0  0  0  0  0  0  0  0
   -0.2821    1.7317    0.0000 O   0  0  0  0  0  0  0  0  0  0  0  0
   -1.4488    1.7317    0.0000 C   0  0  0  0  0  0  0  0  0  0  0  0
    1.8158    0.0140    0.0000 C   0  0  0  0  0  0  0  0  0  0  0  0
    2.3992   -0.5694    0.0000 C   0  0  0  0  0  0  0  0  0  0  0  0
    1.3414   -1.3060    0.0000 O   0  0  0  0  0  0  0  0  0  0  0  0
    1.5742    0.5974    0.0000 H   0  0  0  0  0  0  0  0  0  0  0  0
    2.2283    0.7285    0.0000 C   0  0  0  0  0  0  0  0  0  0  0  0
    3.1961   -0.7829    0.0000 O   0  0  0  0  0  0  0  0  0  0  0  0
    0.2896    0.1392    0.0000 H   0  0  0  0  0  0  0  0  0  0  0  0
  1  2  1  0      
  2  3  1  0      
  3  4  1  0      
  4  5  1  0      
  5  6  1  0      
  6  7  1  0      
  1  8  1  0      
  8  9  1  0      
  9 10  1  0      
  7 11  1  0      
 10 12  1  0      
 12 13  1  0      
 13 14  2  0      
 11 14  1  0      
 13 15  1  0      
  9 16  2  0      
  6 17  1  1      
  6 18  1  6      
  8 19  1  6      
  8 20  1  1      
  3 21  1  0      
 21 22  1  0      
 22 23  1  0      
  5 23  1  6      
  3 24  1  6      
 21 25  2  0      
 22 26  2  0      
  5 27  1  1      
M  END
