# Supplementary material for: Cembrane Derivatives from the Soft Corals, Sinularia gaweli and Sinularia flexibilis
Source: MDPI journal article supplement (doi:10.3390/md11062154), 2013-06-17
Supplement: s5 [file s5]

marinedrugs-11-02154-s003.mol
  corina  04151400013D 1   1.00000     0.00000 
CORINA 3.49 0023  12.04.2013
 26 28  0  0  0  0  0  0  0  0999 V2000
    0.1559    1.8525    0.1527 C   0  0  0  0  0  0  0  0  0  0  0  0
   -0.0594    0.3535   -0.0432 C   0  0  0  0  0  0  0  0  0  0  0  0
    0.0080   -0.3799    1.2899 C   0  0  0  0  0  0  0  0  0  0  0  0
   -1.3389   -1.0695    1.5416 C   0  0  0  0  0  0  0  0  0  0  0  0
   -1.9345   -1.4554    0.1860 C   0  0  0  0  0  0  0  0  0  0  0  0
   -1.4634   -2.7677   -0.4429 C   0  0  0  0  0  0  0  0  0  0  0  0
   -1.2815   -2.7851   -1.9608 C   0  0  0  0  0  0  0  0  0  0  0  0
    1.6611    2.1353    0.1887 C   0  0  0  0  0  0  0  0  0  0  0  0
    2.3685    1.1432   -0.6981 C   0  0  0  0  0  0  0  0  0  0  0  0
    1.8700    0.9150   -2.1035 C   0  0  0  0  0  0  0  0  0  0  0  0
    0.1367   -3.2282   -2.3156 C   0  0  0  0  0  0  0  0  0  0  0  0
    2.5806   -0.2904   -2.7175 C   0  0  0  0  0  0  0  0  0  0  0  0
    1.5797   -1.3782   -3.0116 C   0  0  0  0  0  0  0  0  0  0  0  0
    1.1203   -2.1239   -2.0375 C   0  0  0  0  0  0  0  0  0  0  0  0
    1.1080   -1.6045   -4.4247 C   0  0  0  0  0  0  0  0  0  0  0  0
    3.3276    0.5357   -0.2868 O   0  0  0  0  0  0  0  0  0  0  0  0
    2.1598    2.0275    1.5391 O   0  0  0  0  0  0  0  0  0  0  0  0
    1.9164    3.5502   -0.3313 C   0  0  0  0  0  0  0  0  0  0  0  0
    0.7808   -1.1533    1.2289 H   0  0  0  0  0  0  0  0  0  0  0  0
   -2.1496   -0.6194   -0.4835 H   0  0  0  0  0  0  0  0  0  0  0  0
   -0.5137   -3.6651    0.3557 C   0  0  0  0  0  0  0  0  0  0  0  0
   -2.7796   -2.6012    0.0883 O   0  0  0  0  0  0  0  0  0  0  0  0
    0.3327    0.5438    2.4089 C   0  0  0  0  0  0  0  0  0  0  0  0
    1.4485    1.4473    2.4829 C   0  0  0  0  0  0  0  0  0  0  0  0
   -0.4958    0.5330    3.4503 C   0  0  0  0  0  0  0  0  0  0  0  0
    1.7964    1.7231    3.6143 O   0  0  0  0  0  0  0  0  0  0  0  0
  1  2  1  0      
  2  3  1  0      
  3  4  1  0      
  4  5  1  0      
  5  6  1  0      
  6  7  1  0      
  1  8  1  0      
  8  9  1  0      
  9 10  1  0      
  7 11  1  0      
 10 12  1  0      
 12 13  1  0      
 13 14  2  0      
 11 14  1  0      
 13 15  1  0      
  9 16  2  0      
  8 17  1  0      
  8 18  1  0      
  3 19  1  0      
  5 20  1  0      
  6 21  1  0      
  5 22  1  0      
  6 22  1  0      
  3 23  1  0      
 23 24  1  0      
 17 24  1  0      
 23 25  2  0      
 24 26  2  0      
M  END
$$$$
