# Supplementary material for: Cembrane Derivatives from the Soft Corals, Sinularia gaweli and Sinularia flexibilis
Source: MDPI journal article supplement (doi:10.3390/md11062154), 2013-06-17
Supplement: s6 [file s6]

marinedrugs-11-02154-s003.mol
  ChemDraw02071408452D

 26 28  0  0  0  0  0  0  0  0999 V2000
   -0.1509    0.6327    0.0000 C   0  0  0  0  0  0  0  0  0  0  0  0
    0.6741    0.6327    0.0000 C   0  0  0  0  0  0  0  0  0  0  0  0
    0.9628    0.0552    0.0000 C   0  0  0  0  0  0  0  0  0  0  0  0
    0.6741   -0.5340    0.0000 C   0  0  0  0  0  0  0  0  0  0  0  0
   -0.1509   -0.5340    0.0000 C   0  0  0  0  0  0  0  0  0  0  0  0
   -0.8934   -0.9760    0.0000 C   0  0  0  0  0  0  0  0  0  0  0  0
   -1.5799   -0.5340    0.0000 C   0  0  0  0  0  0  0  0  0  0  0  0
   -0.8934    1.1896    0.0000 C   0  0  0  0  0  0  0  0  0  0  0  0
   -1.5799    0.6327    0.0000 C   0  0  0  0  0  0  0  0  0  0  0  0
   -2.5847    1.0452    0.0000 C   0  0  0  0  0  0  0  0  0  0  0  0
   -2.6878   -0.8523    0.0000 C   0  0  0  0  0  0  0  0  0  0  0  0
   -3.1828    0.4471    0.0000 C   0  0  0  0  0  0  0  0  0  0  0  0
   -2.6672    0.0758    0.0000 C   0  0  0  0  0  0  0  0  0  0  0  0
   -3.2241   -0.2954    0.0000 C   0  0  0  0  0  0  0  0  0  0  0  0
   -1.8422    0.0758    0.0000 C   0  0  0  0  0  0  0  0  0  0  0  0
   -1.3664   -0.1642    0.0000 O   0  0  0  0  0  0  0  0  0  0  0  0
    1.2928    1.4577    0.0000 O   0  0  0  0  0  0  0  0  0  0  0  0
   -1.4768    1.7729    0.0000 C   0  0  0  0  0  0  0  0  0  0  0  0
    1.5462    0.6386    0.0000 H   0  0  0  0  0  0  0  0  0  0  0  0
    0.2616    0.1804    0.0000 H   0  0  0  0  0  0  0  0  0  0  0  0
   -1.1070   -1.7729    0.0000 C   0  0  0  0  0  0  0  0  0  0  0  0
   -0.1509   -1.3590    0.0000 O   0  0  0  0  0  0  0  0  0  0  0  0
    1.7878    0.0552    0.0000 C   0  0  0  0  0  0  0  0  0  0  0  0
    2.4272    0.8390    0.0000 C   0  0  0  0  0  0  0  0  0  0  0  0
    2.2003   -0.6593    0.0000 C   0  0  0  0  0  0  0  0  0  0  0  0
    3.2241    1.0525    0.0000 O   0  0  0  0  0  0  0  0  0  0  0  0
  1  2  1  0      
  2  3  1  0      
  3  4  1  0      
  4  5  1  0      
  5  6  1  0      
  6  7  1  0      
  1  8  1  0      
  8  9  1  0      
  9 10  1  0      
  7 11  1  0      
 10 12  1  0      
 12 13  1  0      
 13 14  2  0      
 11 14  1  0      
 13 15  1  0      
  9 16  2  0      
  8 17  1  6      
  8 18  1  1      
  3 19  1  6      
  5 20  1  1      
  6 21  1  6      
  5 22  1  0      
  6 22  1  0      
  3 23  1  0      
 23 24  1  0      
 17 24  1  0      
 23 25  2  0      
 24 26  2  0      
M  END
